# Supplementary material for: Synthesis and Molecular Docking of Some Novel 3-Thiazolyl-Coumarins as Inhibitors of VEGFR-2 Kinase
Source: MDPI journal article supplement (doi:10.3390/molecules28020689), 2023-01-10
Supplement: s1 [file s1]

## Synthesis and Molecular Docking of Some Novel 3-Thiazolyl-Coumarins as Inhibitors of VEGFR-2 Kinase

Tariq Z. Abolibda<sup>1</sup>, Maher Fathalla<sup>1,2</sup>, Basant Farag<sup>2</sup>, Magdi E. A. Zaki<sup>3</sup> and Sobhi M. Gomha<sup>1,4,\*</sup>, 

<sup>1</sup>Department of Chemistry, Faculty of Science, Islamic University of Madinah, Madinah 42351, Saudi Arabia

<sup>2</sup>Department of Chemistry, Faculty of Science, Zagazig University, Zagazig 44519, Egypt

<sup>3</sup>Department of Chemistry, Faculty of Science, Imam Mohammad Ibn Saud Islamic University (IMSIU), Riyadh 11623, Saudi Arabia

<sup>4</sup>Department of Chemistry, Faculty of Science, Cairo University, Cairo 12613, Egypt

\*Correspondence: smgomha@iu.edu.sa or s.m.gomha@cu.edu.eg or s.m.gomha@gmail.com

### Experimental

Melting points were detected using an Electrothermal IA 9000 series digital melting point instrument. Using infrared spectrophotometers such as the Pye Unicam SP 3300 and Shimadzu FTIR 8101 PC, IR spectra of potassium bromide discs were captured. <sup>1</sup>H-NMR and <sup>13</sup>C-NMR spectra were recorded in DMSO solutions using a BRUKER 400 FT-NMR spectrometer, and chemical shifts were expressed in ppm using TMS as an internal reference. The Shimadzu GCeMS-QP1000 EX mass spectrometer was used to record mass spectra at 70 eV. Elements were analyzed using an Elementar Vario LIII CHNS analyzer manufactured in Germany. The antitumor activity was evaluated by the Regional Center for Mycology and Biotechnology of Al-Azhar University, in Cairo, Egypt.

**3-((1-(2-(4-Methyl-5-(phenyldiazenyl)thiazol-2-yl)hydrazineylidene)ethyl)-6-(phenyldiazenyl)-2H-chromen-2-one (6a).** Red microcrystals, mp 201-203°C; <sup>1</sup>H-NMR (DMSO-*d*<sub>6</sub>)  $\delta$ : 2.25 (s, 3H, CH<sub>3</sub>), 2.61 (s, 3H, CH<sub>3</sub>), 6.96-8.48 (m, 14H, Ar-H), 10.36 (s, br, 1H, NH) ppm; <sup>13</sup>C-NMR (DMSO-*d*<sub>6</sub>):  $\delta$  8.4, 14.7 (CH), 116.3, 118.7, 119.9, 120.1, 123.8, 123.9, 125.0, 129.9, 130.2, 132.9, 136.2, 141.9, 142.7, 147.9, 151.1, 152.6, 154.6, 156.5, 160.0, 162.1 (Ar-C and C=N), 163.5 (C=O) ppm; IR (KBr)  $\nu$  cm<sup>-1</sup>: 3374 (NH), 1725 (C=O), 1606 (C=N); MS *m/z* (%): 507.13 (M<sup>+</sup>, 51). Anal. calcd for C<sub>27</sub>H<sub>21</sub>N<sub>7</sub>O<sub>2</sub>S (507.57): C, 63.89; H, 4.17; N, 19.32. Found: C, 63.77; H, 4.03; N, 19.20%.

**3-(1-(2-(4-Methyl-5-(p-tolyldiazenyl)thiazol-2-yl)hydrazineylidene)ethyl)-6-(phenyldiazenyl)-2H-chromen-2-one (6b).** Orange microcrystals, mp 193-195 °C; <sup>1</sup>H-NMR (DMSO-*d*<sub>6</sub>)  $\delta$ : 2.26 (s, 3H, CH<sub>3</sub>), 2.46 (s, 3H, CH<sub>3</sub>), 2.60 (s, 3H, CH<sub>3</sub>), 7.15-8.54 (m, 13H, Ar-H), 10.64 (s, br, 1H, NH) ppm; IR (KBr)  $\nu$  cm<sup>-1</sup>: 3371 (NH), 1721 (C=O), 1603 (C=N); MS *m/z* (%): 521 (M<sup>+</sup>, 47). Anal. calcd for C<sub>28</sub>H<sub>23</sub>N<sub>7</sub>O<sub>2</sub>S (521.60): C, 64.48; H, 4.44; N, 18.80. Found: C, 64.27; H, 4.36; N, 18.69%.

**3-(1-(2-(5-((4-Methoxyphenyl)diazenyl)-4-methylthiazol-2-yl)hydrazineylidene)ethyl)-6-**

**(phenyldiazenyl)-2H-chromen-2-one (6c).** Red microcrystals, mp 179-181 °C; <sup>1</sup>H-NMR (DMSO-*d*<sub>6</sub>) δ: 2.23 (s, 3H, CH<sub>3</sub>), 2.42 (s, 3H, CH<sub>3</sub>), 3.82 (s, 3H, OCH<sub>3</sub>), 6.86-8.19 (m, 13H, Ar-H), 10.38 (s, br, 1H, NH) ppm; <sup>13</sup>C-NMR (DMSO-*d*<sub>6</sub>): δ 9.1, 14.7 (CH<sub>3</sub>), 56.5 (OCH<sub>3</sub>), 114.1, 115.8, 119.8, 121.9, 122.3, 125.9, 128.6, 129.8, 130.1, 132.1, 134.1, 136.4, 138.3, 139.8, 142.7, 146.7, 149.6, 149.7, 150.0, 158.2 (Ar-C and C=N), 164.1 (C=O) ppm; IR (KBr) ν cm<sup>-1</sup>: 3338 (NH), 1725 (C=O), 1605 (C=N); MS m/z (%): 537 (62). Anal. calcd for C<sub>28</sub>H<sub>23</sub>N<sub>7</sub>O<sub>3</sub>S (537.60): C, 62.56; H, 4.31; N, 18.24. Found: C, 62.47; H, 4.19; N, 18.07%.

**3-(1-(2-(5-((4-Chlorophenyl)diazenyl)-4-methylthiazol-2-yl)hydrazineylidene)ethyl)-6-**

**(phenyldiazenyl)-2H-chromen-2-one (6d).** Red microcrystals, mp 207-209 °C; <sup>1</sup>H-NMR (DMSO-*d*<sub>6</sub>) δ: 2.24 (s, 3H, CH<sub>3</sub>), 2.42 (s, 3H, CH<sub>3</sub>), 6.54-8.81 (m, 13H, Ar-H), 10.73 (s, br, 1H, NH) ppm; IR (KBr) ν cm<sup>-1</sup>: 3377 (NH), 1728 (C=O), 1609 (C=N); MS m/z (%): 544 (M<sup>+</sup>+2, 8), 542 (M<sup>+</sup>, 30). Anal. calcd for C<sub>27</sub>H<sub>20</sub>ClN<sub>7</sub>O<sub>2</sub>S (542.01): C, 59.83; H, 3.72; N, 18.09. Found: C, 59.69; H, 3.58; N, 18.01%.

**3-(1-(2-(5-((2,4-Dichlorophenyl)diazenyl)-4-methylthiazol-2-yl)hydrazineylidene)ethyl)-6-**

**(phenyldiazenyl)-2H-chromen-2-one (6e).** Dark red microcrystals, mp 216-218 °C; <sup>1</sup>H-NMR (DMSO-*d*<sub>6</sub>) δ: 2.42 (s, 3H, CH<sub>3</sub>), 6.86-8.52 (m, 12H, Ar-H), 10.37 (s, br, 1H, NH) ppm; IR (KBr) ν cm<sup>-1</sup>: 3380 (NH), 1729 (C=O), 1613 (C=N); MS m/z (%): 576 (M<sup>+</sup>, 49). Anal. calcd for C<sub>27</sub>H<sub>19</sub>Cl<sub>2</sub>N<sub>7</sub>O<sub>2</sub>S (576.46): C, 56.26; H, 3.32; N, 17.01. Found: C, 56.13; H, 3.25; N, 16.86%.

**2-(2-(1-(2-oxo-6-(Phenyldiazenyl)-2H-chromen-3-yl)ethylidene)hydrazineyl)-5-(2-(p-**

**tolyl)hydrazineylidene)thiazol-4(5H)-one (10a).** Yellow microcrystals, mp 178-170 °C; <sup>1</sup>H-NMR (DMSO-*d*<sub>6</sub>) δ: 2.26 (s, 3H, CH<sub>3</sub>), 2.27 (s, 3H, CH<sub>3</sub>), 7.02-7.92 (m, 13H, Ar-H), 10.54 (s, br, 1H, NH), 10.79 (s, br, 1H, NH) ppm; <sup>13</sup>C-NMR (DMSO-*d*<sub>6</sub>): δ 8.9, 14.2 (CH<sub>3</sub>), 117.0, 118.8, 120.4, 122.5, 122.8, 123.0, 124.2, 127.0, 129.3, 129.5, 129.7, 129.8, 129.9, 130.0, 138.5, 142.1, 145.2, 152.3, 156.7 (Ar-C and C=N), 163.0, 171.3 (C=O) ppm; IR (KBr) ν cm<sup>-1</sup>: 3413, 3289 (2NH), 1724, 1692 (2C=O), 1604 (C=N); MS m/z (%): 523 (M<sup>+</sup>, 100). Anal. calcd for C<sub>27</sub>H<sub>21</sub>N<sub>7</sub>O<sub>3</sub>S (523.57): C, 61.94; H, 4.04; N, 18.73. Found: C, 61.94; H, 4.04; N, 18.73%.

**5-(2-(4-Chlorophenyl)hydrazineylidene)-2-(2-(1-(2-oxo-6-((phenyldiazenyl)-2H-chromen-3-**

**yl)ethylidene)hydrazineyl)thiazol-4(5H)-one (10b).** Yellow microcrystals, mp 190-192 °C; <sup>1</sup>H-NMR (DMSO-*d*<sub>6</sub>) δ: 2.20 (s, 3H, CH<sub>3</sub>), 7.03-7.93 (m, 13H, Ar-H), 10.38 (s, br, 1H, NH), 10.70 (s, br, 1H, NH) ppm; IR (KBr) ν cm<sup>-1</sup>: 3439, 3277 (2NH), 1725, 1697 (2C=O), 1606 (C=N); MS m/z (%): 545 (M<sup>+</sup>+2, 25), 543 (M<sup>+</sup>, 79). Anal. calcd for C<sub>26</sub>H<sub>18</sub>ClN<sub>7</sub>O<sub>3</sub>S (543.99): C, 57.41; H, 3.34; N, 18.02. Found: C, 57.36; H, 3.18; N, 17.85%.

**5-(2-(4-Nitrophenyl)hydrazineylidene)-2-(2-(1-(2-oxo-6-(phenyldiazenyl)-2H-chromen-3-**

**yl)ethylidene)hydrazineyl)thiazol-4(5H)-one (10c).** Brown microcrystals, mp 178-170 °C; <sup>1</sup>H-NMR (DMSO-*d*<sub>6</sub>) δ: 2.32 (s, 3H, CH<sub>3</sub>), 7.50-8.34 (m, 13H, Ar-H), 10.38 (s, br, 1H, NH), 11.09 (s, br, 1H, NH) ppm; IR (KBr) ν cm<sup>-1</sup>: 3435, 3297 (2NH), 1727, 1704 (2C=O), 1616 (C=N); MS m/z (%): 554 (M<sup>+</sup>, 64). Anal. calcd for C<sub>26</sub>H<sub>18</sub>N<sub>8</sub>O<sub>5</sub>S (554.54): C, 56.31; H, 3.27; N, 20.21. Found: C, 56.19; H, 3.06; N, 20.14%.

**6-(Phenyldiazenyl)-3-(1-(2-(4-phenylthiazol-2-yl)hydrazineylidene)ethyl)-2H-chromen-2-one (12a).**

Yellow microcrystals, mp 217-219 °C; <sup>1</sup>H-NMR (DMSO-*d*<sub>6</sub>) δ: 2.31 (s, 3H, CH<sub>3</sub>), 6.94-8.42 (m, 14H, Ar-H), 11.32 (s, br, 1H, NH) ppm; <sup>13</sup>C-NMR (DMSO-*d*<sub>6</sub>): δ 10.1(CH<sub>3</sub>), 106.1, 116.5, 116.6, 117.9, 119.8, 120.0, 124.6, 125.3, 125.8, 129.5, 129.6, 131.6, 133.1, 136.5, 139.9, 143.4, 144.0, 150.8, 153.8, 159.6 (Ar-C and C=N), 164.5 (C=O) ppm; IR (KBr) ν cm<sup>-1</sup>: 3327 (NH), 1722 (C=O), 1609 (C=N); MS m/z (%): 465 (M<sup>+</sup>, 91). Anal. calcd for C<sub>26</sub>H<sub>19</sub>N<sub>5</sub>O<sub>2</sub>S (465.53): C, 67.08; H, 4.11; N, 15.04. Found: C, 67.15; H, 4.03; N, 14.91%.

**3-(1-(2-(4-(4-Methoxyphenyl)thiazol-2-yl)hydrazineylidene)ethyl)-6-(phenyldiazenyl)-2H-chromen-2-one (12b).** Yellow microcrystals, mp 205-207 °C; <sup>1</sup>H-NMR (DMSO-*d*<sub>6</sub>) δ: 2.30 (s, 3H, CH<sub>3</sub>), 3.82 (s, 3H, OCH<sub>3</sub>), 7.25-8.38 (m, 13H, Ar-H), 11.53 (s, br, 1H, NH) ppm; IR (KBr) ν cm<sup>-1</sup>: 3366 (NH), 1723 (C=O), 1602(C=N); MS m/z (%): **495 (M<sup>+</sup>, 58)**. Anal. calcd for C<sub>27</sub>H<sub>21</sub>N<sub>5</sub>O<sub>3</sub>S (495.56): C, 65.44; H, 4.27; N, 14.13. Found: C, 65.30; H, 4.13; N, 14.04%.

**3-(1-(2-(4-(4-Nitrophenyl)thiazol-2-yl)hydrazineylidene)ethyl)-6-(phenyldiazenyl)-2H-chromen-2-one (12c).** Brown microcrystals, mp 231-233 °C; <sup>1</sup>H-NMR (DMSO-*d*<sub>6</sub>) δ: 2.31 (s, 3H, CH<sub>3</sub>), 7.62-8.44 (m, 13H, Ar-H), 11.59 (s, br, 1H, NH) ppm; IR (KBr) ν cm<sup>-1</sup>: 3373 (NH), 1724 (C=O), 1606 (C=N); **MS m/z (%): 510 (M<sup>+</sup>, 37)**. Anal. calcd for C<sub>26</sub>H<sub>18</sub>N<sub>6</sub>O<sub>4</sub>S (510.53): C, 61.17; H, 3.55; N, 16.46. Found: C, 61.03; H, 3.48; N, 16.35%.

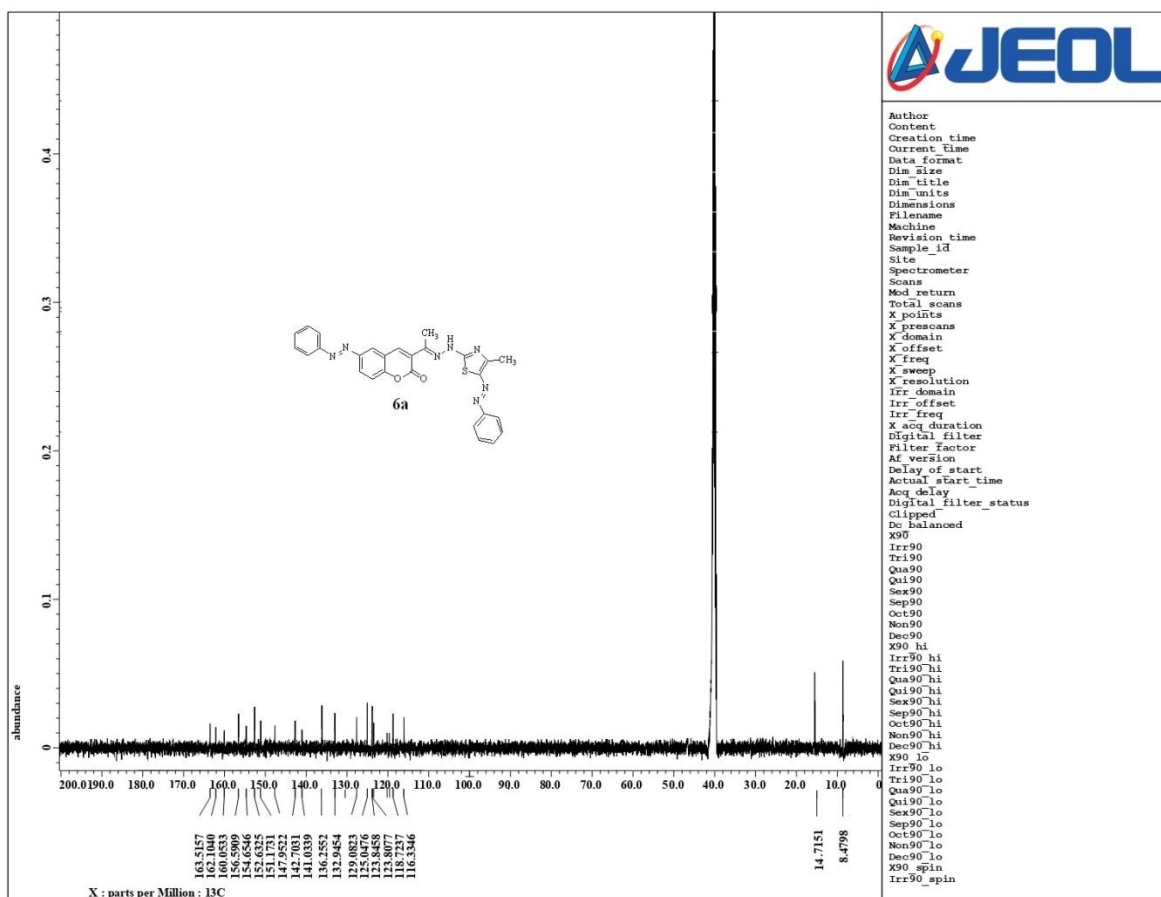

<sup>13</sup>C-NMR spectra of compound 6a

Sobhy M-Gomaa\_H\_220

Microanalytical Unit - FOPCU - NMR laboratory  
www.pharma.cu.edu.eg dir-mau.fopcu@pharma.cu.edu.eg

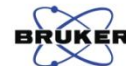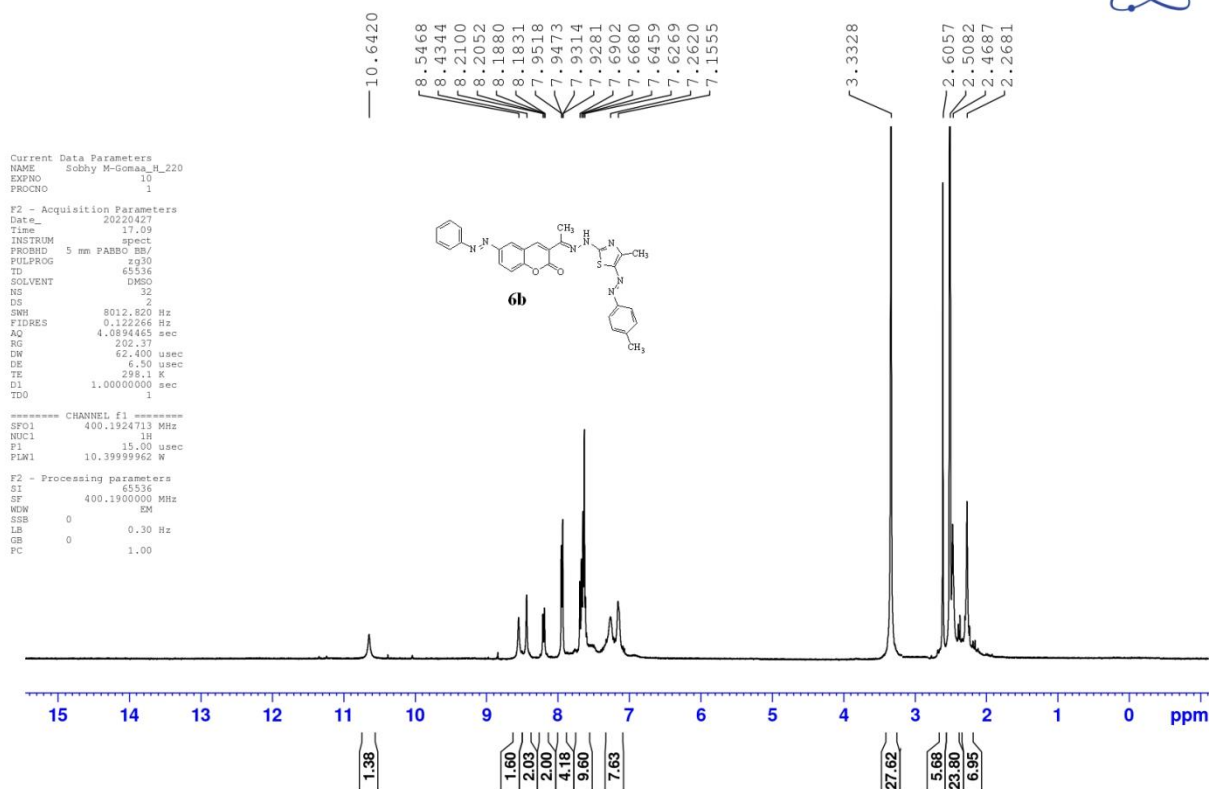

<sup>1</sup>H-NMR spectra of compound 6b

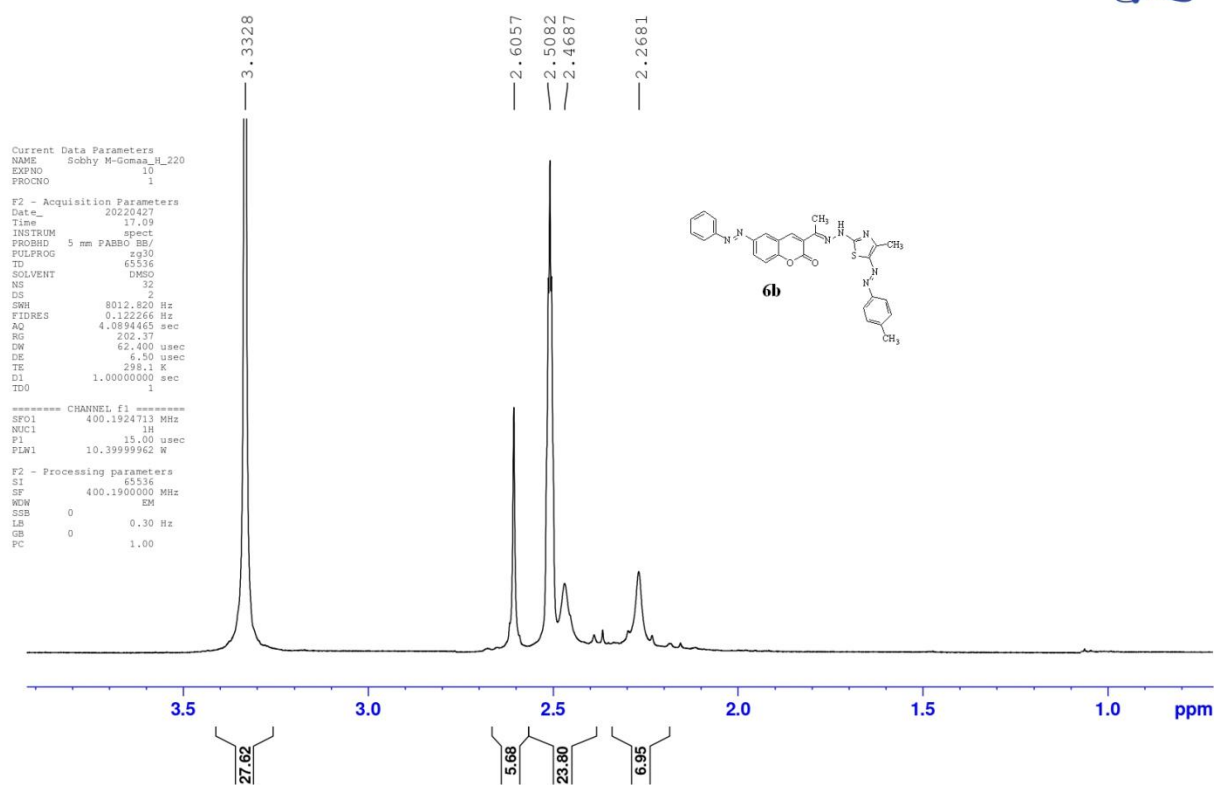<sup>1</sup>H-NMR spectra of compound **6b-1**

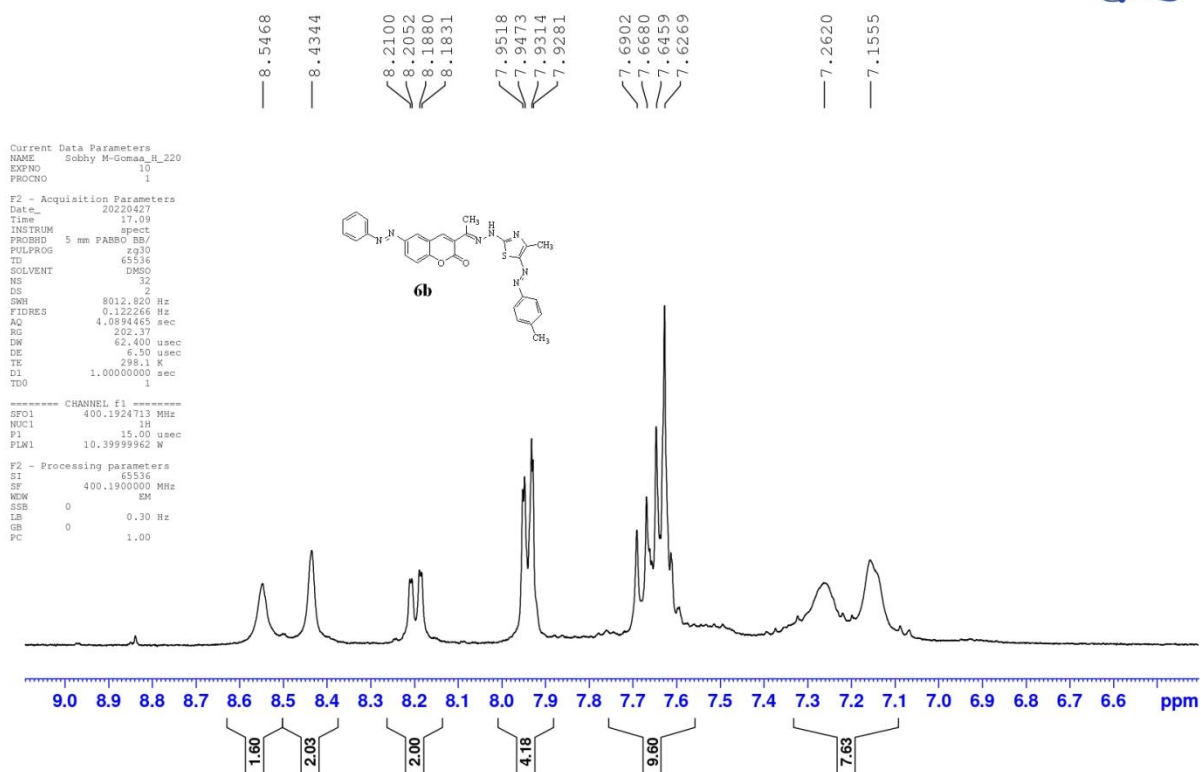<sup>1</sup>H-NMR spectra of compound **6b-2**

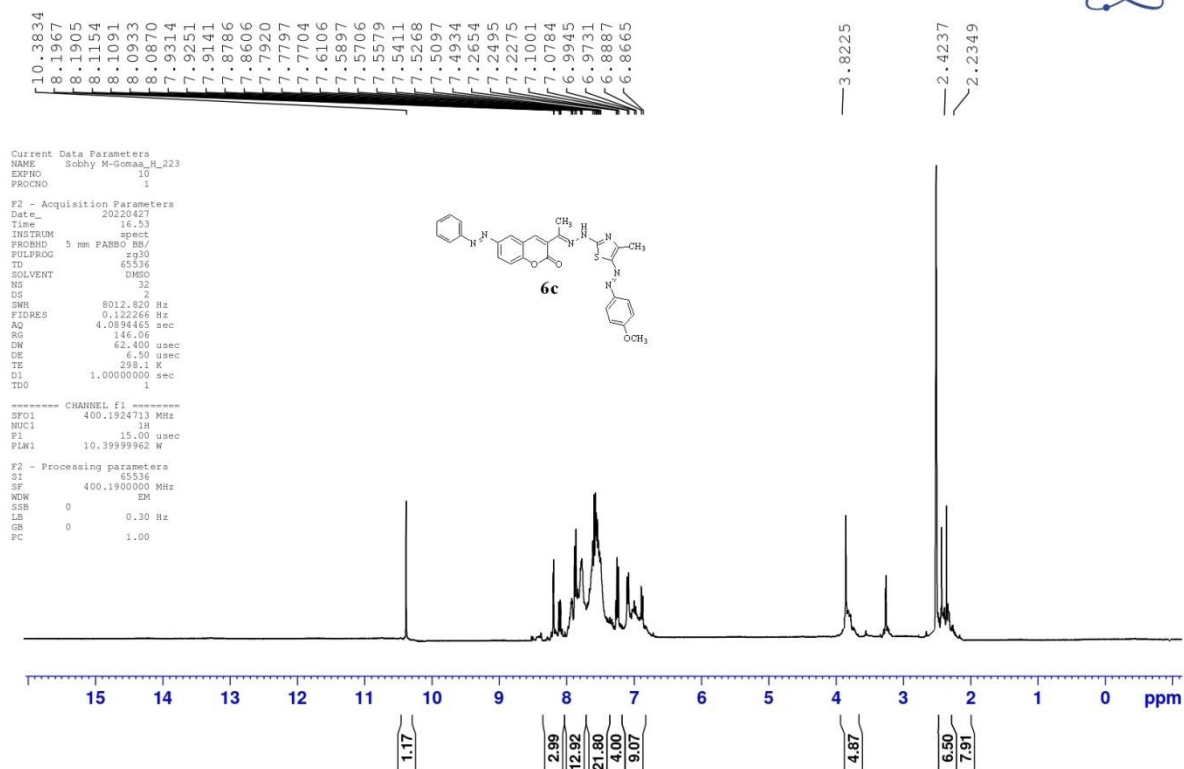<sup>1</sup>H-NMR spectra of compound 6c

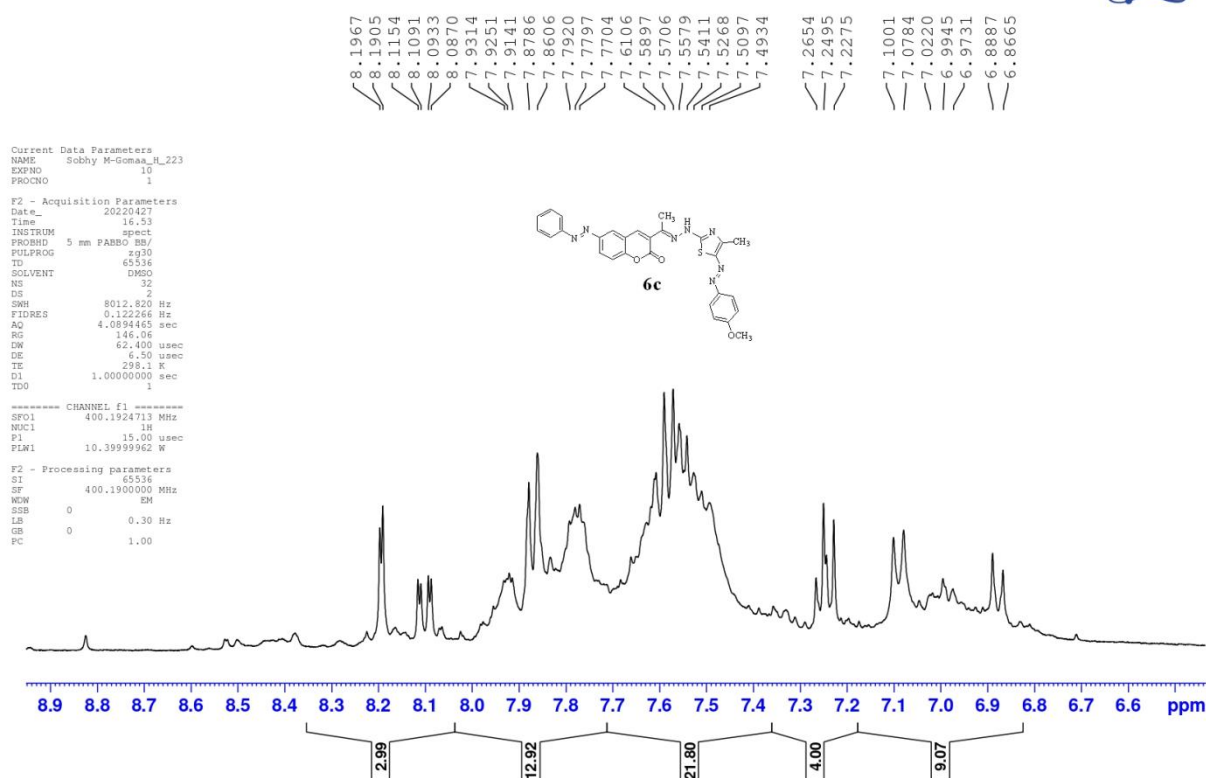<sup>1</sup>H-NMR spectra of compound **6c-2**



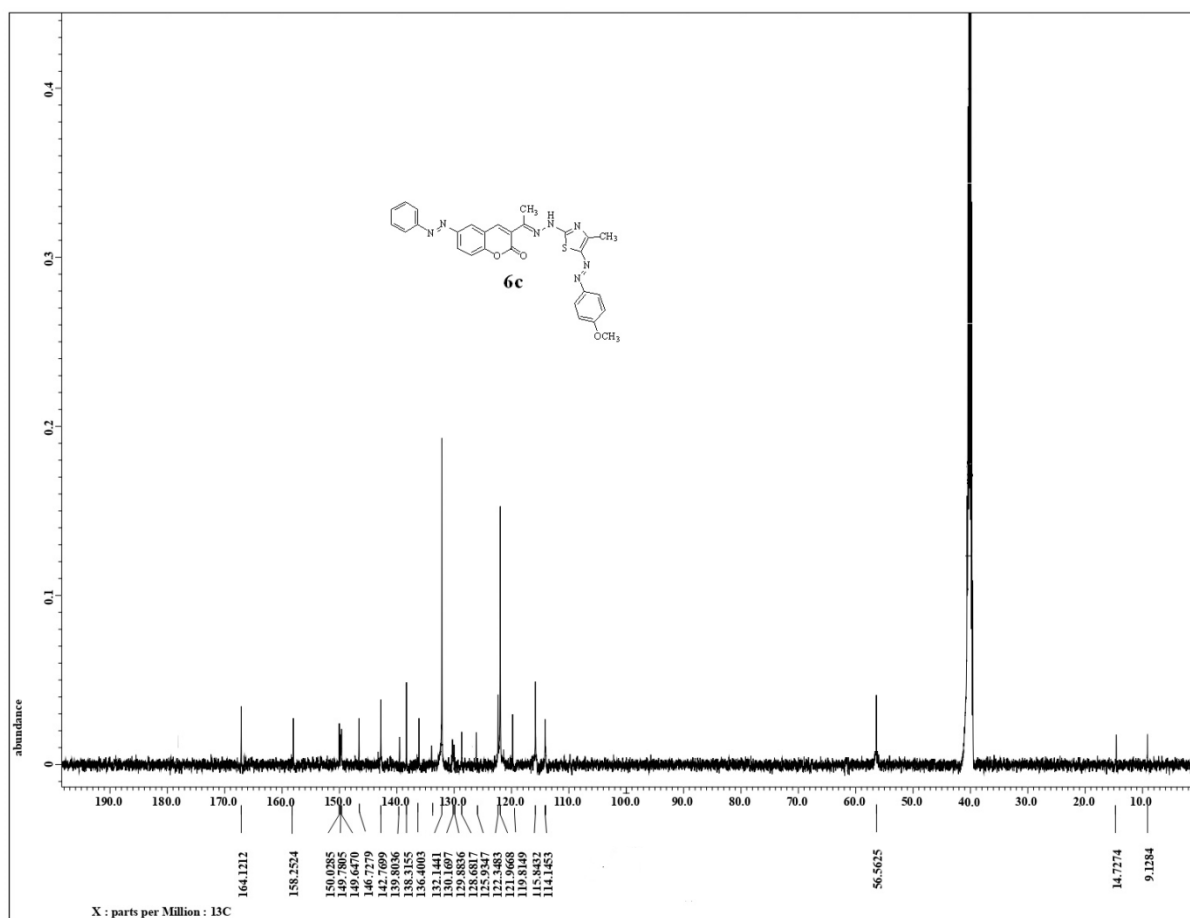

$^{13}\text{C}$ -NMR spectra of compound **6c**

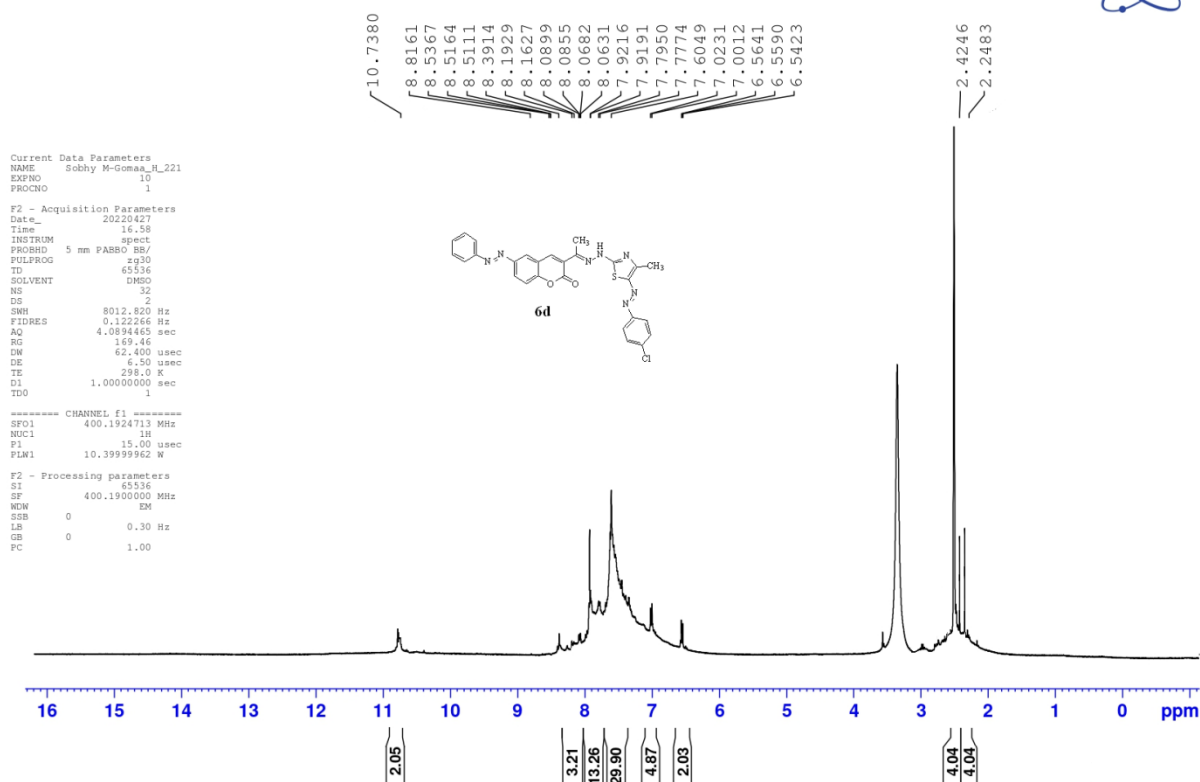<sup>1</sup>H-NMR spectra of compound **6d**

Current Data Parameters  
NAME Sobhy M-Gomaa\_C\_225  
EXPNO 10  
PROCNO 1

F2 - Acquisition Parameters  
Date\_ 20220415  
Time 7.09  
INSTRUM spect  
PROBHD 5 mm PABBO BB/  
PULPROG zgpg30  
TD 65536  
SOLVENT DMSO  
NS 1500  
DS 4  
SWH 24038.461 Hz  
FIDRES 0.366798 Hz  
AQ 1.3631488 sec  
RG 202.37  
DW 20.800 usec  
DE 6.50 usec  
TE 298.0 K  
D1 2.00000000 sec  
D11 0.03000000 sec  
TD0 1

===== CHANNEL f1 =====  
SFO1 100.6379178 MHz  
NUC1 13C  
P1 10.00 usec  
PLW1 45.00000000 W

===== CHANNEL f2 =====  
SFO2 400.1916008 MHz  
NUC2 1H  
CPDPRG2 waltz16

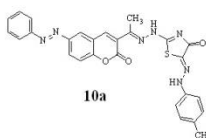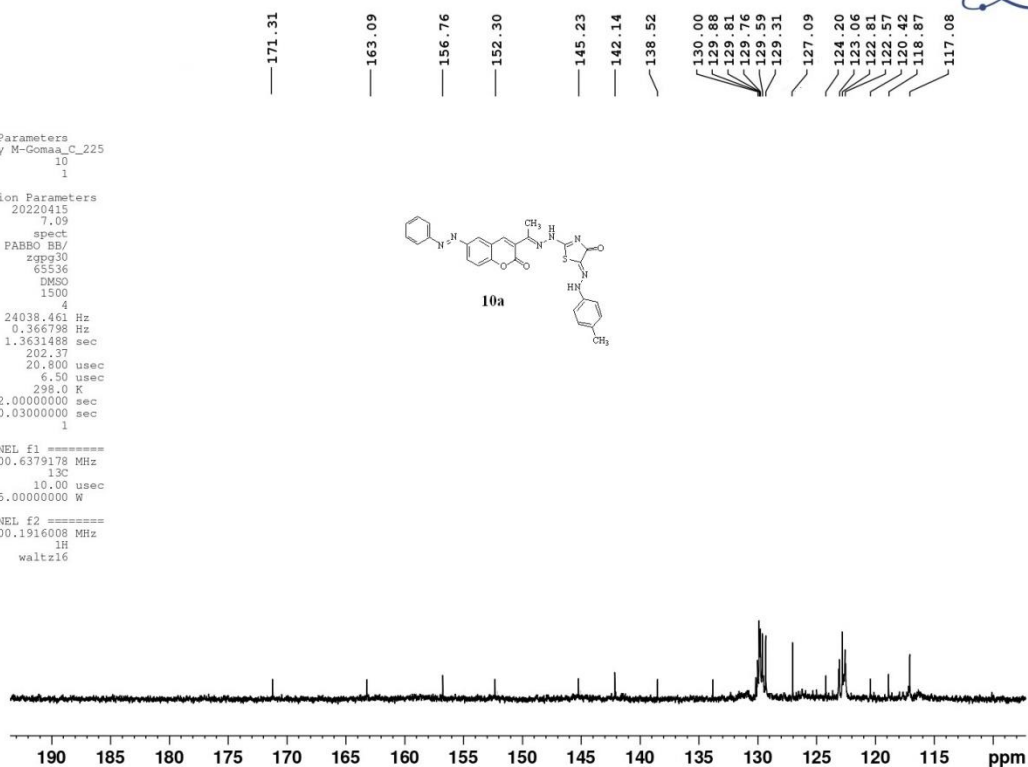

<sup>13</sup>C-NMR spectra of compound 10a

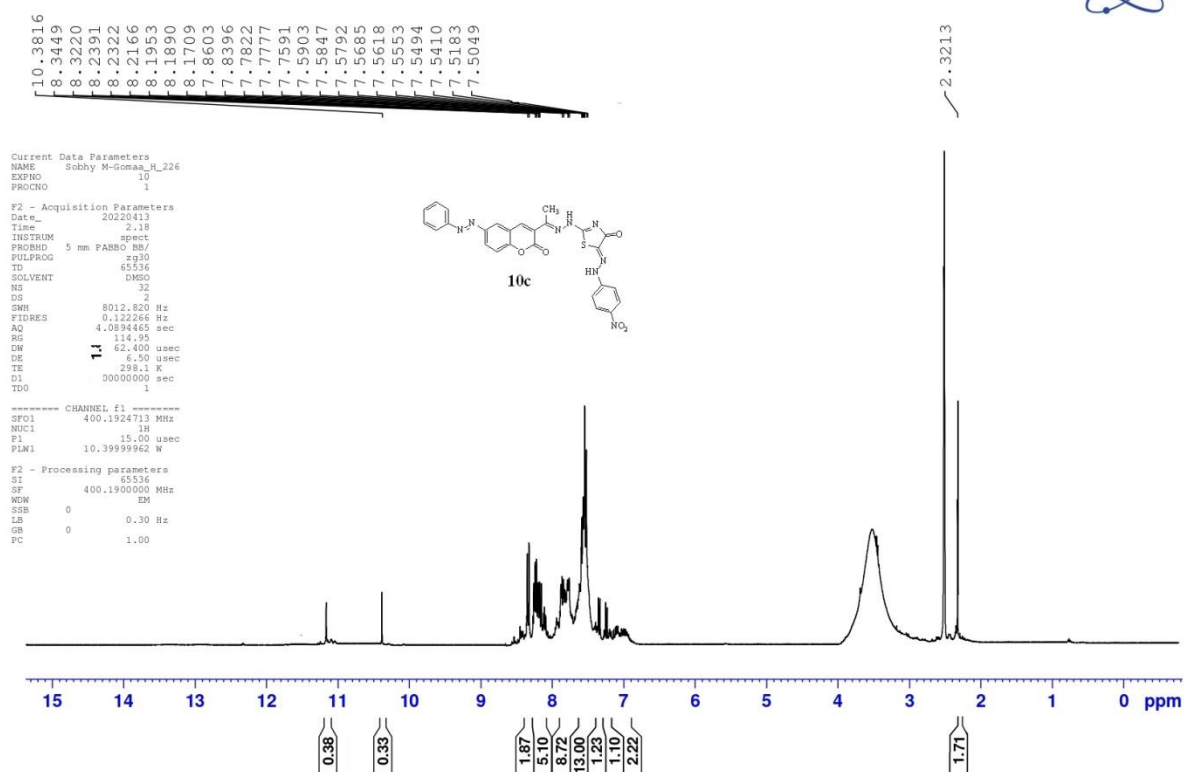<sup>1</sup>H-NMR spectra of compound 10c

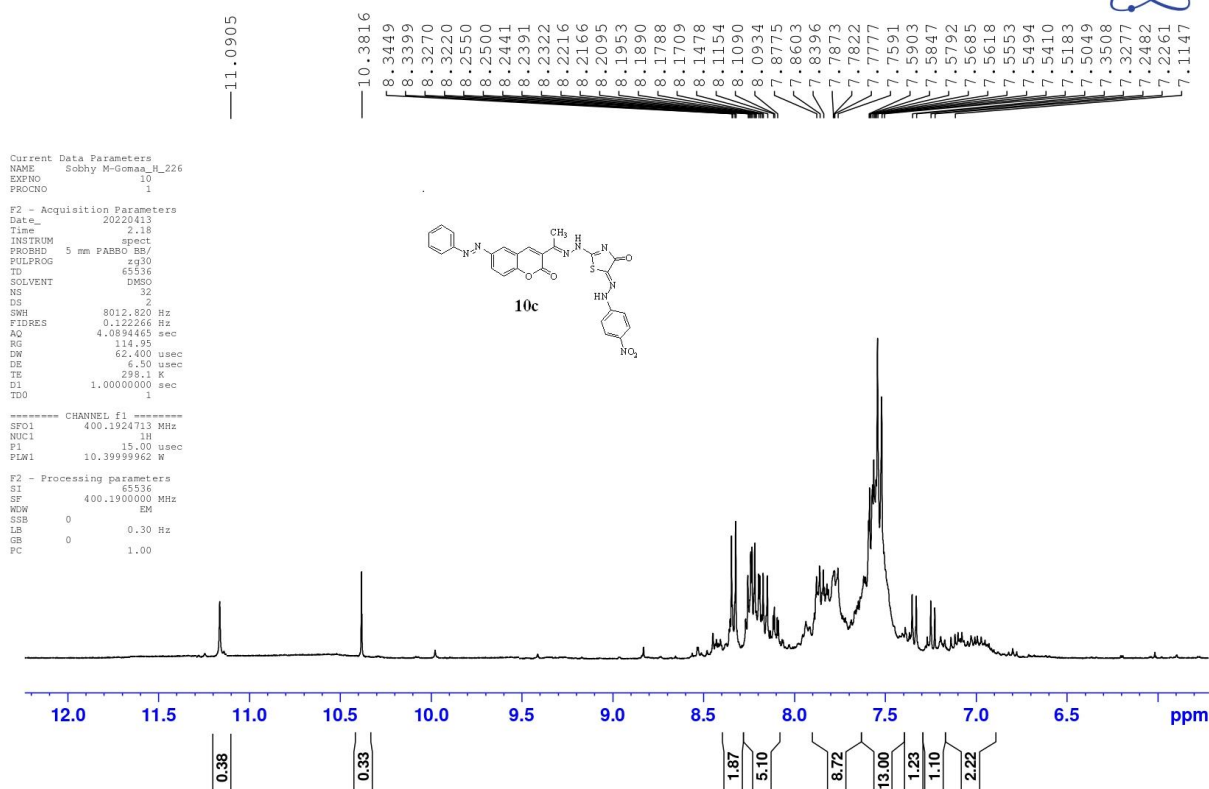<sup>1</sup>H-NMR spectra of compound 10c-2

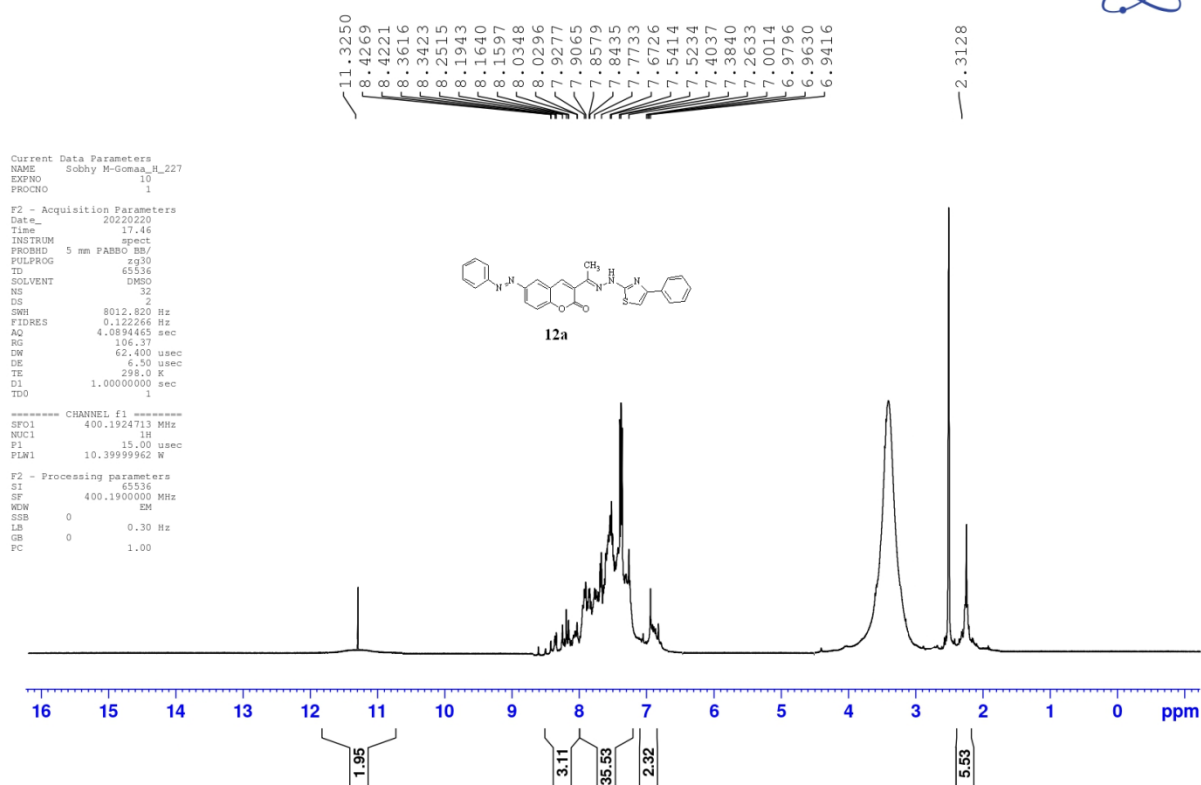<sup>1</sup>H-NMR spectra of compound 12a

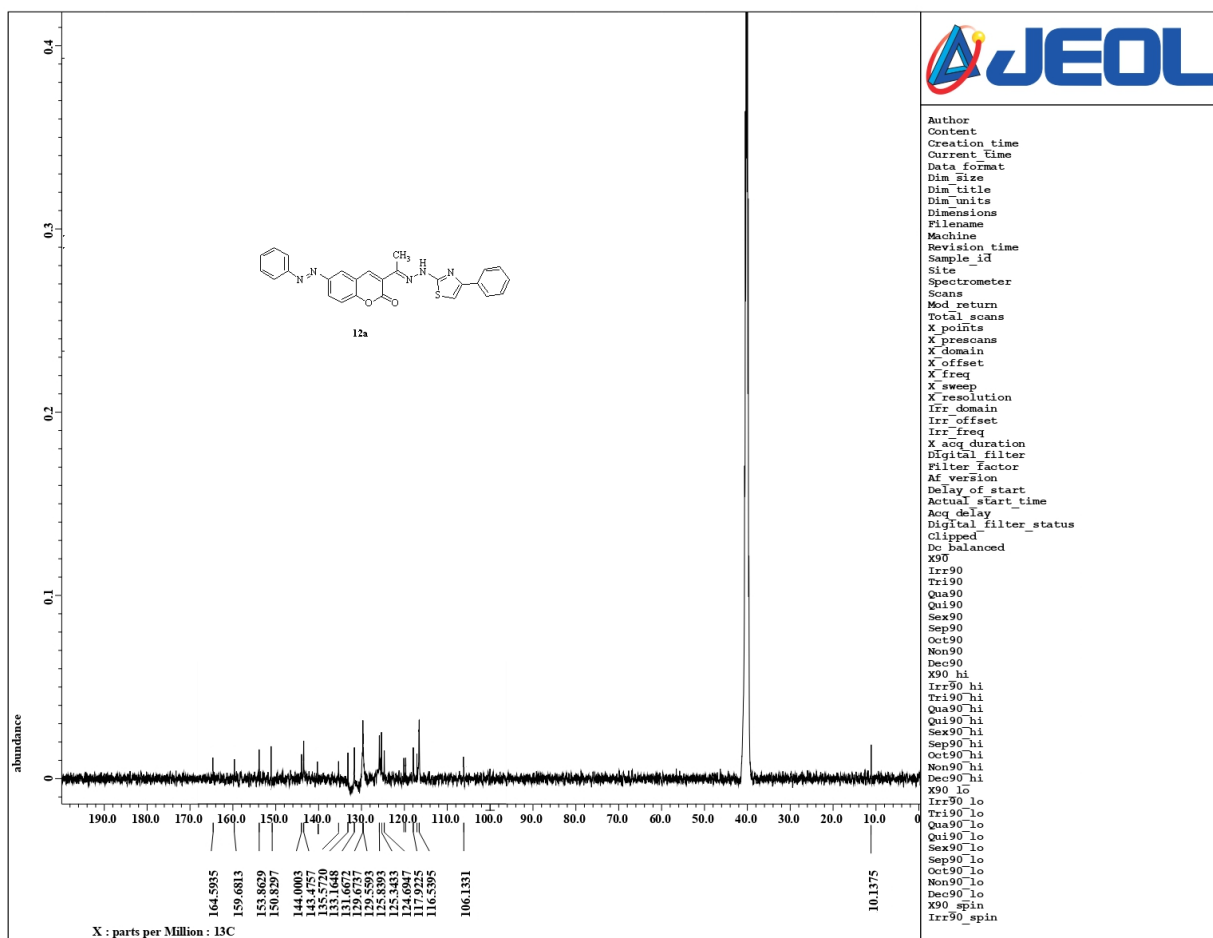

<sup>13</sup>C-NMR spectra of compound 12a

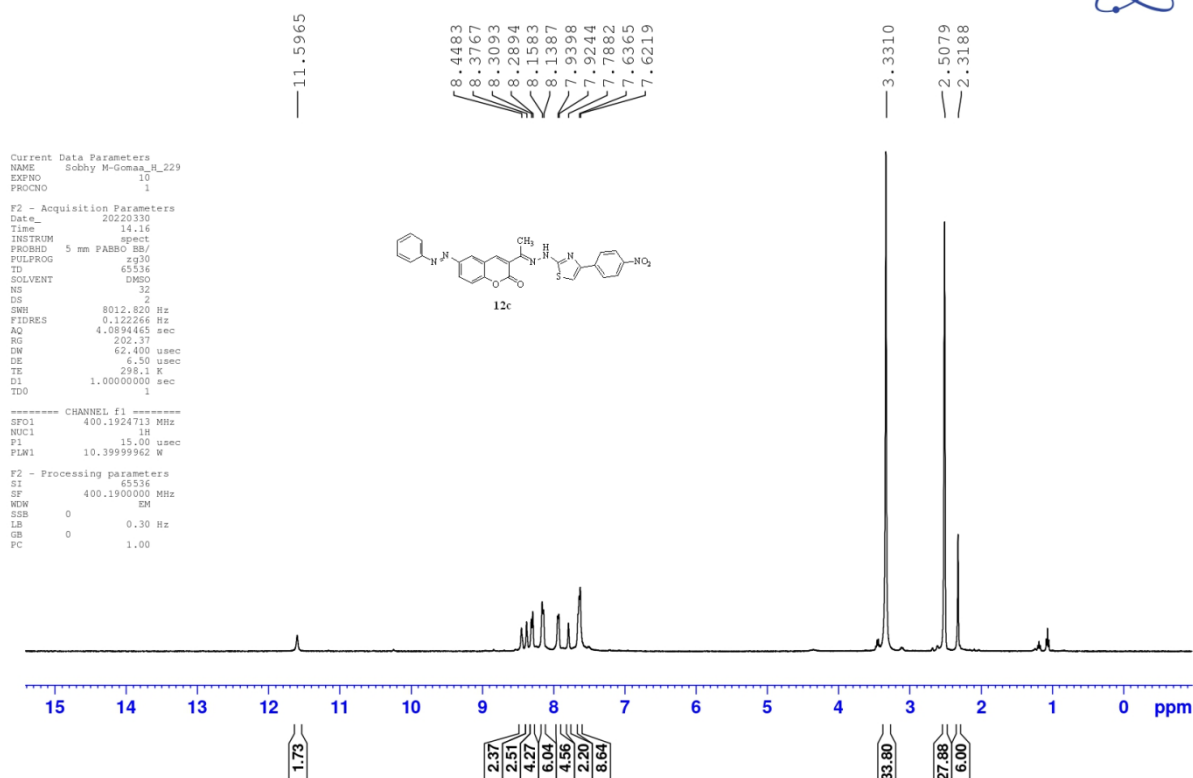<sup>1</sup>H-NMR spectra of compound 12c



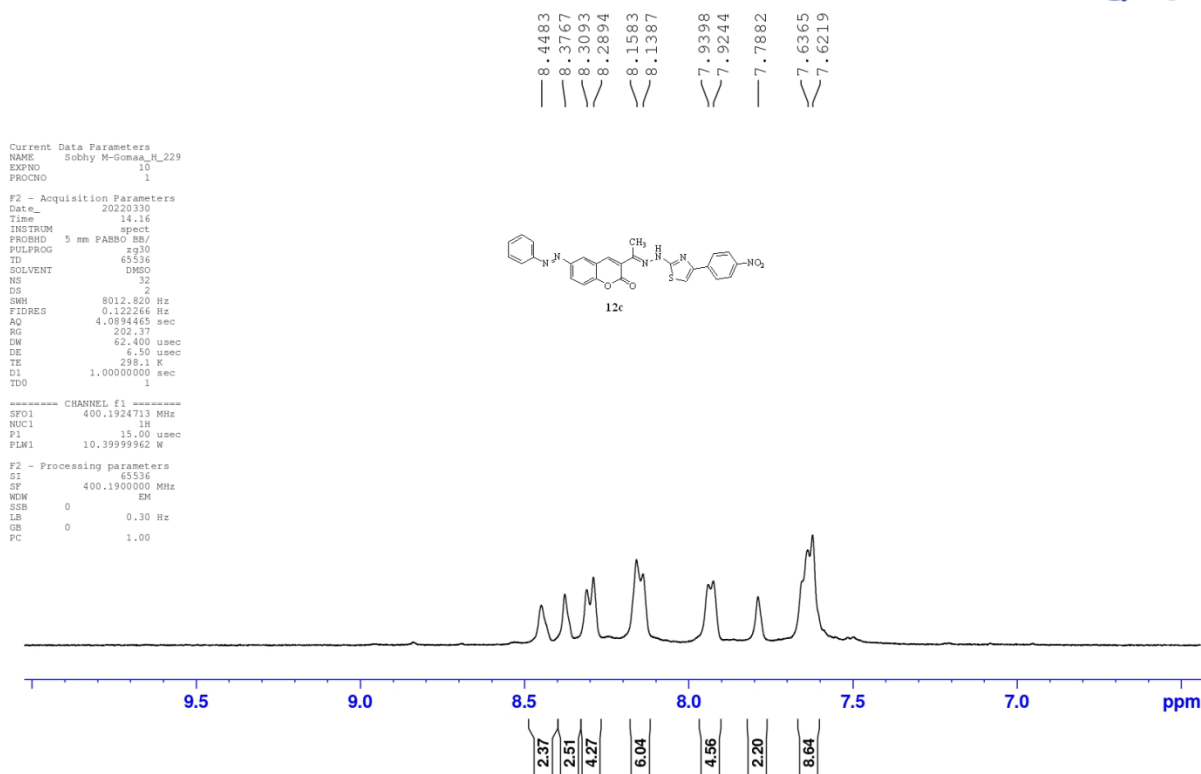<sup>1</sup>H-NMR spectra of compound 12c-1**Cytotoxicity assay:**

The tested human breast cancer (MCF-7) cell lines and normal cell line LLC-Mk2 were obtained from the American Type Culture Collection (ATCC, Rockville, MD). The cells were grown on RPMI-1640 medium supplemented with 10% inactivated fetal calf serum and 50 µg/mL gentamycin (Lonza, Belgium). The cells were maintained at 37°C in a humidified atmosphere with 5% CO<sub>2</sub> and were subcultured two to three times a week during the period of experiment .

For antitumor assays, the tumor cell lines were suspended in medium at cell density of 5x10<sup>4</sup> cells/well in Corning® 96-well tissue culture plates and then incubated for 24 hours. The tested compounds were then added into 96-well plates (six replicates) to achieve eight concentrations for each compound. Six vehicle controls with media or 0.5 % DMSO were run for each 96 well plate as a control. After incubating for 24 h, the numbers of viable cells were determined by the MTT assay [1]. Briefly, the media was removed from the 96-well plate and replaced with 100 µl of fresh culture RPMI 1640 medium without phenol red then 10

μL of the 12 mM MTT stock solution {5 mg of 3-(4,5-dimethylthiazol-2-yl)-2,5-diphenyltetrazolium bromide purchased from Sigma-Aldrich (St. Louis, MO) in 1 mL of Phosphate buffered saline} to each well including the untreated controls. The 96 well plates were then incubated at 37°C and 5% CO<sub>2</sub> for 4 hours. An 85 μl aliquot of the media was removed from the wells, and 50 μL of DMSO was added to each well and mixed thoroughly with the pipette and incubated at 37 °C for 10 min. Then, the optical density was measured at 590 nm with the microplate reader (SunRise, TECAN, Inc, USA) to determine the number of viable cells and the percentage of viability was calculated as [(ODt/ODc)]x100% where ODt is the mean optical density of wells treated with the tested sample and ODc is the mean optical density of untreated cells. The relation between surviving cells and drug concentration is plotted to get the survival curve of each tumor cell line after treatment with the specified compound. The 50% inhibitory concentration (IC<sub>50</sub>), the concentration required to cause toxic effects in 50% of intact cells, was estimated from graphic plots of the dose response curve for each conc. using GraphPad Prism software (San Diego, CA. USA)[2].

1. Mosmann, T. Rapid colorimetric assay for cellular growth and survival: application to proliferation and cytotoxicity assays. *J. Immunol. Methods* **1983**, 65, 55-63.
2. Gomha, S.M.; Riyadh, S.M.; Mahmoud, E.A.; Elaasser, M.M. Synthesis and anticancer activities of thiazoles, 1,3-thiazines, and thiazolidine using chitosan-grafted-poly(vinylpyridine) as basic catalyst. *Heterocycles* **2015**, 91, 1227-1243.
